# Supplementary material for: On the stability of noble gas bound 1-tris(pyrazolyl)borate beryllium and magnesium complexes
Source: Royal Society of Chemistry journal article supplement (doi:10.1039/c5nj00983a), 2015-01-01
Supplement: c5nj00983a1.pdf [file c5nj00983a1.pdf]

## On the Stability of Noble Gas bound 1-Tris(pyrazolyl)borate Beryllium and Magnesium Complexes

Sudip Pan, Ranajit Saha, and Pratim K. Chattaraj\*

*Department of Chemistry and Centre for Theoretical Studies*

*Indian Institute of Technology Kharagpur, 721302, India*

\*Corresponding author: [pkc@chem.iitkgp.ernet.in](mailto:pkc@chem.iitkgp.ernet.in)

### Supporting information

**Table S1.** Stretching frequency of Ng-M bonds (M=Be,Mg) and their corresponding IR intensity are given for TpMNg<sup>+</sup> clusters studied at the MPW1B95/def2-TZVP level.

| Clusters            | Frequency (cm <sup>-1</sup> ) | Intensity (km/mol) | Clusters            | Frequency (cm <sup>-1</sup> ) | Intensity (km/mol) |
|---------------------|-------------------------------|--------------------|---------------------|-------------------------------|--------------------|
| TpBeHe <sup>+</sup> | 318.68                        | 0.04               | TpMgHe <sup>+</sup> | 240.57                        | 8.65               |
| TpBeNe <sup>+</sup> | 129.07                        | 3.14               | TpMgNe <sup>+</sup> | 133.64                        | 0.13               |
| TpBeAr <sup>+</sup> | 125.64                        | 3.80               | TpMgAr <sup>+</sup> | 89.50                         | 1.46               |
| TpBeKr <sup>+</sup> | 99.41                         | 3.22               | TpMgKr <sup>+</sup> | 76.73                         | 1.39               |
| TpBeXe <sup>+</sup> | 86.60                         | 3.03               | TpMgXe <sup>+</sup> | 68.01                         | 1.75               |
| TpBeRn <sup>+</sup> | 73.05                         | 3.39               | TpMgRn <sup>+</sup> | 60.86                         | 2.05               |

**Table S2.** The valence orbital population of M and Ng centers in TpMNg<sup>+</sup> clusters obtained at the MPW1B95/def2-TZVP level.

| Clusters            | M                                                                                                                  | Ng                                                                                                                 |
|---------------------|--------------------------------------------------------------------------------------------------------------------|--------------------------------------------------------------------------------------------------------------------|
| TpBe <sup>+</sup>   | 2s <sup>0.26</sup> 2p <sub>x</sub> <sup>0.22</sup> 2p <sub>y</sub> <sup>0.22</sup> 2p <sub>z</sub> <sup>0.03</sup> |                                                                                                                    |
| TpBeHe <sup>+</sup> | 2s <sup>0.28</sup> 2p <sub>x</sub> <sup>0.24</sup> 2p <sub>y</sub> <sup>0.24</sup> 2p <sub>z</sub> <sup>0.11</sup> | 1s <sup>1.90</sup>                                                                                                 |
| TpBeNe <sup>+</sup> | 2s <sup>0.27</sup> 2p <sub>x</sub> <sup>0.23</sup> 2p <sub>y</sub> <sup>0.23</sup> 2p <sub>z</sub> <sup>0.08</sup> | 2s <sup>1.97</sup> 2p <sub>x</sub> <sup>2.00</sup> 2p <sub>y</sub> <sup>2.00</sup> 2p <sub>z</sub> <sup>1.97</sup> |
| TpBeAr <sup>+</sup> | 2s <sup>0.29</sup> 2p <sub>x</sub> <sup>0.24</sup> 2p <sub>y</sub> <sup>0.24</sup> 2p <sub>z</sub> <sup>0.15</sup> | 3s <sup>1.93</sup> 3p <sub>x</sub> <sup>1.99</sup> 3p <sub>y</sub> <sup>1.99</sup> 3p <sub>z</sub> <sup>1.90</sup> |
| TpBeKr <sup>+</sup> | 2s <sup>0.30</sup> 2p <sub>x</sub> <sup>0.24</sup> 2p <sub>y</sub> <sup>0.24</sup> 2p <sub>z</sub> <sup>0.18</sup> | 4s <sup>1.92</sup> 4p <sub>x</sub> <sup>1.98</sup> 4p <sub>y</sub> <sup>1.98</sup> 4p <sub>z</sub> <sup>1.87</sup> |
| TpBeXe <sup>+</sup> | 2s <sup>0.31</sup> 2p <sub>x</sub> <sup>0.24</sup> 2p <sub>y</sub> <sup>0.24</sup> 2p <sub>z</sub> <sup>0.22</sup> | 5s <sup>1.92</sup> 5p <sub>x</sub> <sup>1.98</sup> 5p <sub>y</sub> <sup>1.98</sup> 5p <sub>z</sub> <sup>1.82</sup> |
| TpBeRn <sup>+</sup> | 2s <sup>0.32</sup> 2p <sub>x</sub> <sup>0.24</sup> 2p <sub>y</sub> <sup>0.24</sup> 2p <sub>z</sub> <sup>0.23</sup> | 6s <sup>1.93</sup> 6p <sub>x</sub> <sup>1.98</sup> 6p <sub>y</sub> <sup>1.98</sup> 6p <sub>z</sub> <sup>1.79</sup> |
|                     |                                                                                                                    |                                                                                                                    |
| TpMg <sup>+</sup>   | 3s <sup>0.20</sup> 3p <sub>x</sub> <sup>0.08</sup> 3p <sub>y</sub> <sup>0.08</sup> 3p <sub>z</sub> <sup>0.02</sup> |                                                                                                                    |
| TpMgHe <sup>+</sup> | 3s <sup>0.22</sup> 3p <sub>x</sub> <sup>0.09</sup> 3p <sub>y</sub> <sup>0.09</sup> 3p <sub>z</sub> <sup>0.05</sup> | 1s <sup>1.95</sup>                                                                                                 |
| TpMgNe <sup>+</sup> | 3s <sup>0.21</sup> 3p <sub>x</sub> <sup>0.09</sup> 3p <sub>y</sub> <sup>0.09</sup> 3p <sub>z</sub> <sup>0.04</sup> | 2s <sup>1.98</sup> 2p <sub>x</sub> <sup>2.00</sup> 2p <sub>y</sub> <sup>2.00</sup> 2p <sub>z</sub> <sup>1.98</sup> |
| TpMgAr <sup>+</sup> | 3s <sup>0.24</sup> 3p <sub>x</sub> <sup>0.10</sup> 3p <sub>y</sub> <sup>0.10</sup> 3p <sub>z</sub> <sup>0.08</sup> | 3s <sup>1.96</sup> 3p <sub>x</sub> <sup>1.99</sup> 3p <sub>y</sub> <sup>1.99</sup> 3p <sub>z</sub> <sup>1.94</sup> |
| TpMgKr <sup>+</sup> | 3s <sup>0.25</sup> 3p <sub>x</sub> <sup>0.10</sup> 3p <sub>y</sub> <sup>0.10</sup> 3p <sub>z</sub> <sup>0.10</sup> | 4s <sup>1.96</sup> 4p <sub>x</sub> <sup>1.99</sup> 4p <sub>y</sub> <sup>1.99</sup> 4p <sub>z</sub> <sup>1.92</sup> |
| TpMgXe <sup>+</sup> | 3s <sup>0.26</sup> 3p <sub>x</sub> <sup>0.10</sup> 3p <sub>y</sub> <sup>0.10</sup> 3p <sub>z</sub> <sup>0.12</sup> | 5s <sup>1.95</sup> 5p <sub>x</sub> <sup>1.99</sup> 5p <sub>y</sub> <sup>1.99</sup> 5p <sub>z</sub> <sup>1.89</sup> |
| TpMgRn <sup>+</sup> | 3s <sup>0.27</sup> 3p <sub>x</sub> <sup>0.10</sup> 3p <sub>y</sub> <sup>0.10</sup> 3p <sub>z</sub> <sup>0.13</sup> | 6s <sup>1.96</sup> 6p <sub>x</sub> <sup>1.98</sup> 6p <sub>y</sub> <sup>1.98</sup> 6p <sub>z</sub> <sup>1.87</sup> |

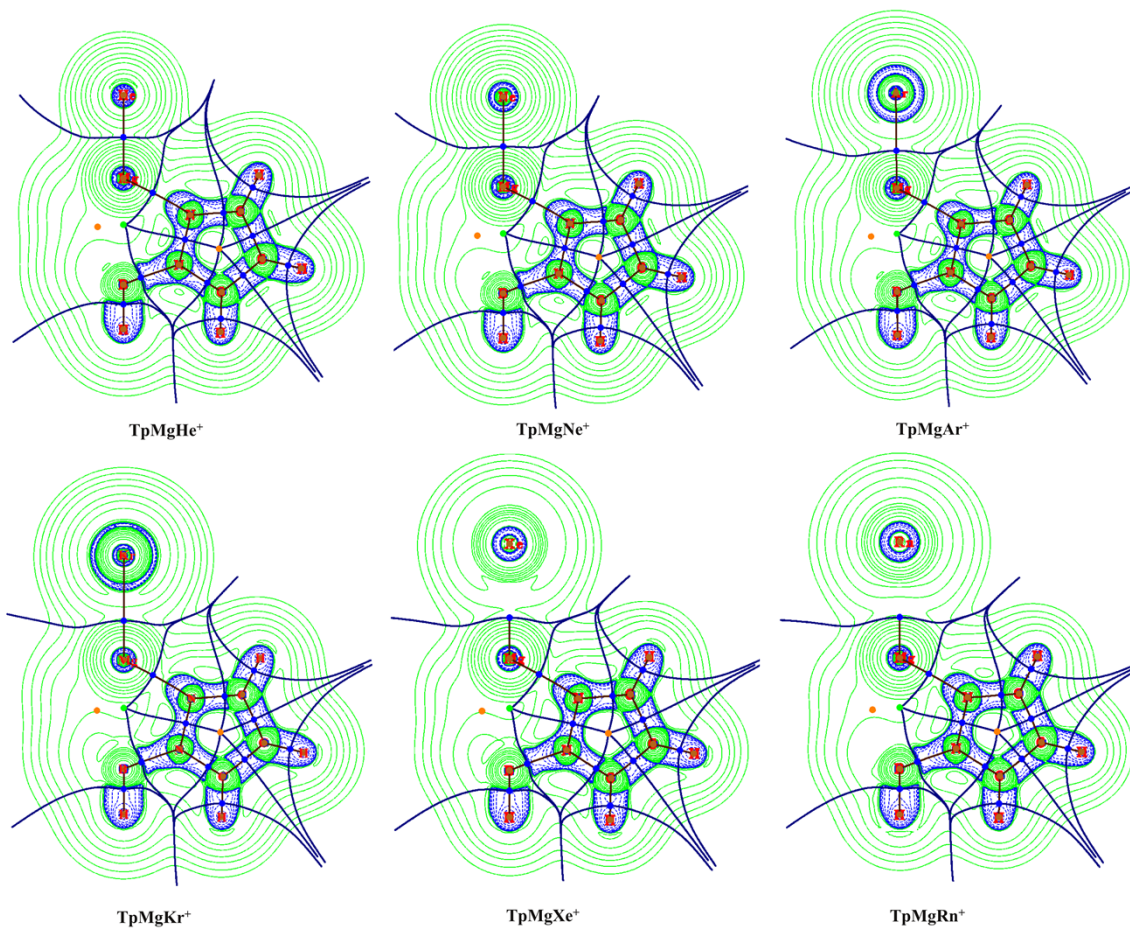

**Figure S1.** The plots of Laplacian of electron density ( $\nabla^2\rho(r)$ ) of TpMgNg<sup>+</sup> complexes at the MPW1B95/def2-TZVP level.

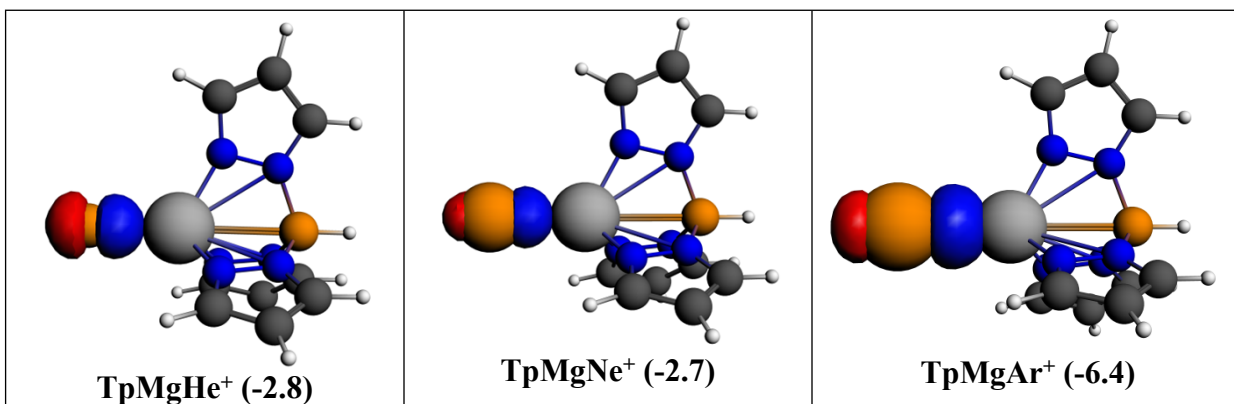

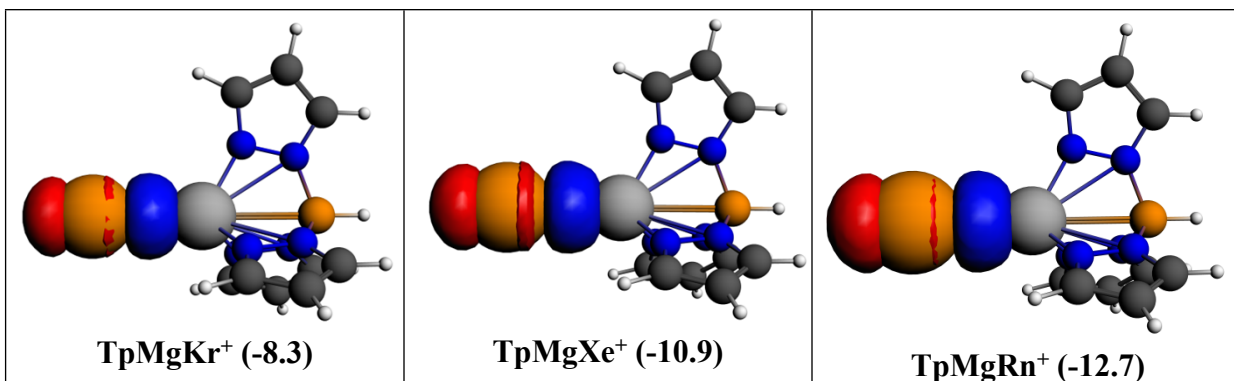

**Figure S2.** The plot of deformation densities ( $\Delta\rho$ ) of the pair-wise orbital interactions and the associated  $\Delta E^{\text{orb}}$  energies obtained from the EDA-NOCV.  $\Delta E^{\text{orb}}$  is given within the parentheses in kcal/mol.

### The Cartesian coordinates of the studied complexes

\*\*\*\*\*

TpBeF

```

0 1
B      0.00000000  0.00000000 -1.36659300
H      0.00000000  0.00000000 -2.55982400
Be     0.00000000  0.00000000  1.41002200
N      0.00000000  1.53378700  0.55617200
N      0.00000000  1.42379100 -0.77753800
N      1.32829900 -0.76689400  0.55617200
N      1.23304000 -0.71189600 -0.77753800
N     -1.32829900 -0.76689400  0.55617200
N     -1.23304000 -0.71189600 -0.77753800
C      0.00000000  2.82174900  0.85025400
H      0.00000000  3.13814600  1.87756400
C      0.00000000  3.57316700 -0.32021200
H      0.00000000  4.64159500 -0.41744200
C      0.00000000  2.63757700 -1.33114100
H      0.00000000  2.75301400 -2.39933000
C      2.44370600 -1.41087500  0.85025400
H      2.71771400 -1.56907300  1.87756400
C      3.09445300 -1.78658400 -0.32021200
H      4.01974000 -2.32079800 -0.41744200
C      2.28420800 -1.31878800 -1.33114100

```

|   |             |             |             |
|---|-------------|-------------|-------------|
| H | 2.38418000  | -1.37650700 | -2.39933000 |
| C | -2.44370600 | -1.41087500 | 0.85025400  |
| H | -2.71771400 | -1.56907300 | 1.87756400  |
| C | -3.09445300 | -1.78658400 | -0.32021200 |
| H | -4.01974000 | -2.32079800 | -0.41744200 |
| C | -2.28420800 | -1.31878800 | -1.33114100 |
| H | -2.38418000 | -1.37650700 | -2.39933000 |
| F | 0.00000000  | 0.00000000  | 2.84875600  |

\*\*\*\*\*

TrBe<sup>+</sup>

1 1

|    |             |             |             |
|----|-------------|-------------|-------------|
| B  | 0.00000000  | 0.00000000  | 1.14832300  |
| H  | 0.00000000  | 0.00000000  | 2.33427200  |
| Be | 0.00000000  | 0.00000000  | -1.34623600 |
| N  | 0.00000000  | 1.55256900  | -0.79713200 |
| N  | 0.00000000  | 1.43081600  | 0.54982400  |
| N  | -1.34456400 | -0.77628500 | -0.79713200 |
| N  | -1.23912300 | -0.71540800 | 0.54982400  |
| N  | 1.34456400  | -0.77628500 | -0.79713200 |
| N  | 1.23912300  | -0.71540800 | 0.54982400  |
| C  | 0.00000000  | 2.84908800  | -1.08502500 |
| H  | 0.00000000  | 3.18740600  | -2.10563400 |
| C  | 0.00000000  | 3.58425500  | 0.08673700  |
| H  | 0.00000000  | 4.65211800  | 0.18825100  |
| C  | 0.00000000  | 2.64463900  | 1.09615600  |
| H  | 0.00000000  | 2.76310600  | 2.16435600  |
| C  | -2.46738300 | -1.42454400 | -1.08502500 |
| H  | -2.76037500 | -1.59370300 | -2.10563400 |
| C  | -3.10405600 | -1.79212800 | 0.08673700  |
| H  | -4.02885200 | -2.32605900 | 0.18825100  |
| C  | -2.29032500 | -1.32232000 | 1.09615600  |
| H  | -2.39292000 | -1.38155300 | 2.16435600  |
| C  | 2.46738300  | -1.42454400 | -1.08502500 |
| H  | 2.76037500  | -1.59370300 | -2.10563400 |
| C  | 3.10405600  | -1.79212800 | 0.08673700  |
| H  | 4.02885200  | -2.32605900 | 0.18825100  |
| C  | 2.29032500  | -1.32232000 | 1.09615600  |
| H  | 2.39292000  | -1.38155300 | 2.16435600  |

\*\*\*\*\*

TrBeHe<sup>+</sup>

1 1

|   |            |            |            |
|---|------------|------------|------------|
| B | 0.00000000 | 0.00000000 | 1.20231300 |
| H | 0.00000000 | 0.00000000 | 2.38856600 |

|       |             |             |             |
|-------|-------------|-------------|-------------|
| Be    | 0.00000000  | 0.00000000  | -1.32139000 |
| N     | -1.52208000 | -0.28442400 | -0.74128700 |
| N     | -1.40503200 | -0.26281700 | 0.60405600  |
| N     | 1.00735800  | -1.17594700 | -0.74128700 |
| N     | 0.93012200  | -1.08538500 | 0.60405600  |
| N     | 0.51472200  | 1.46037100  | -0.74128700 |
| N     | 0.47490900  | 1.34820200  | 0.60405600  |
| C     | -2.79658500 | -0.52285600 | -1.03055000 |
| H     | -3.12891700 | -0.58504300 | -2.05130700 |
| C     | -3.52096300 | -0.65894000 | 0.14002700  |
| H     | -4.57065300 | -0.85565800 | 0.24039400  |
| C     | -2.59796400 | -0.48660000 | 1.15019500  |
| H     | -2.71490700 | -0.50938100 | 2.21826500  |
| C     | 1.85109900  | -2.16048500 | -1.03055000 |
| H     | 2.07112000  | -2.41720000 | -2.05130700 |
| C     | 2.33114000  | -2.71977300 | 0.14002700  |
| H     | 3.02634700  | -3.53047200 | 0.24039400  |
| C     | 1.72039000  | -2.00660300 | 1.15019500  |
| H     | 1.79859000  | -2.09648800 | 2.21826500  |
| C     | 0.94548500  | 2.68334100  | -1.03055000 |
| H     | 1.05779700  | 3.00224300  | -2.05130700 |
| C     | 1.18982300  | 3.37871300  | 0.14002700  |
| H     | 1.54430500  | 4.38613000  | 0.24039400  |
| C     | 0.87757400  | 2.49320300  | 1.15019500  |
| H     | 0.91631700  | 2.60586900  | 2.21826500  |
| He    | 0.00000000  | 0.00000000  | -3.06443100 |
| ***** |             |             |             |

TpBeNe<sup>+</sup>

|     |             |             |             |
|-----|-------------|-------------|-------------|
| l 1 |             |             |             |
| B   | 0.00000000  | 0.00000000  | -1.42037200 |
| H   | 0.00000000  | 0.00000000  | -2.60661900 |
| Be  | 0.00000000  | 0.00000000  | 1.10347900  |
| N   | -1.54902200 | -0.00102100 | 0.52352200  |
| N   | -1.42949500 | -0.00044000 | -0.82216000 |
| N   | 0.77362700  | 1.34200300  | 0.52352200  |
| N   | 0.71436600  | 1.23819900  | -0.82216000 |
| N   | 0.77539500  | -1.34098200 | 0.52352200  |
| N   | 0.71512900  | -1.23775900 | -0.82216000 |
| C   | -2.84552300 | -0.00092200 | 0.81222100  |
| H   | -3.18415100 | -0.00106000 | 1.83278800  |
| C   | -3.58239700 | 0.00000000  | -0.35858400 |
| H   | -4.65031400 | 0.00047800  | -0.45932400 |
| C   | -2.64320600 | 0.00012200  | -1.36838200 |
| H   | -2.76207300 | 0.00106300  | -2.43650000 |
| C   | 1.42196300  | 2.46475600  | 0.81222100  |

|    |            |             |             |
|----|------------|-------------|-------------|
| H  | 1.59115800 | 2.75808600  | 1.83278800  |
| C  | 1.79119900 | 3.10244700  | -0.35858400 |
| H  | 2.32557100 | 4.02705100  | -0.45932400 |
| C  | 1.32170900 | 2.28902300  | -1.36838200 |
| H  | 1.38195700 | 2.39149400  | -2.43650000 |
| C  | 1.42356000 | -2.46383400 | 0.81222100  |
| H  | 1.59299400 | -2.75702600 | 1.83278800  |
| C  | 1.79119900 | -3.10244700 | -0.35858400 |
| H  | 2.32474300 | -4.02752900 | -0.45932400 |
| C  | 1.32149700 | -2.28914500 | -1.36838200 |
| H  | 1.38011600 | -2.39255700 | -2.43650000 |
| Ne | 0.00000000 | 0.00000000  | 3.12204900  |

\*\*\*\*\*

TpBeAr<sup>+</sup>

|     |             |             |             |
|-----|-------------|-------------|-------------|
| l 1 |             |             |             |
| B   | 0.00000000  | 0.00000000  | -1.64505600 |
| H   | 0.00000000  | 0.00000000  | -2.83177300 |
| Be  | 0.00000000  | 0.00000000  | 0.91169000  |
| N   | 0.00000000  | 1.54539700  | 0.29656900  |
| N   | 0.00000000  | 1.42801300  | -1.04750700 |
| N   | 1.33835300  | -0.77269900 | 0.29656900  |
| N   | 1.23669600  | -0.71400700 | -1.04750700 |
| N   | -1.33835300 | -0.77269800 | 0.29656900  |
| N   | -1.23669600 | -0.71400600 | -1.04750700 |
| C   | 0.00000000  | 2.84159600  | 0.58596300  |
| H   | 0.00000000  | 3.17967600  | 1.60672700  |
| C   | 0.00000000  | 3.58037600  | -0.58393800 |
| H   | 0.00000000  | 4.64835500  | -0.68390300 |
| C   | 0.00000000  | 2.64161200  | -1.59407900 |
| H   | 0.00000000  | 2.76056300  | -2.66214700 |
| C   | 2.46089400  | -1.42079800 | 0.58596300  |
| H   | 2.75368000  | -1.58983800 | 1.60672700  |
| C   | 3.10069700  | -1.79018800 | -0.58393800 |
| H   | 4.02559400  | -2.32417800 | -0.68390300 |
| C   | 2.28770300  | -1.32080600 | -1.59407900 |
| H   | 2.39071800  | -1.38028200 | -2.66214700 |
| C   | -2.46089400 | -1.42079800 | 0.58596300  |
| H   | -2.75368000 | -1.58983800 | 1.60672700  |
| C   | -3.10069700 | -1.79018800 | -0.58393800 |
| H   | -4.02559400 | -2.32417700 | -0.68390300 |
| C   | -2.28770300 | -1.32080600 | -1.59407900 |
| H   | -2.39071800 | -1.38028100 | -2.66214700 |
| Ar  | 0.00000000  | 0.00000000  | 3.16971900  |

\*\*\*\*\*

TpBeKr<sup>+</sup>

|       |             |             |             |
|-------|-------------|-------------|-------------|
| l 1   |             |             |             |
| B     | 0.00000000  | 0.00000000  | -2.05735400 |
| H     | 0.00000000  | 0.00000000  | -3.24423100 |
| Be    | 0.00000000  | 0.00000000  | 0.50945000  |
| N     | 1.54465100  | 0.00000000  | -0.11638000 |
| N     | 1.42752000  | -0.00001400 | -1.46000300 |
| N     | -0.77232500 | -1.33770700 | -0.11638000 |
| N     | -0.71377200 | -1.23626200 | -1.46000300 |
| N     | -0.77232600 | 1.33770700  | -0.11638000 |
| N     | -0.71374800 | 1.23627600  | -1.46000300 |
| C     | 2.84084200  | -0.00082600 | 0.17275800  |
| H     | 3.17926500  | -0.00134400 | 1.19339100  |
| C     | 3.57983500  | -0.00134200 | -0.99709600 |
| H     | 4.64780100  | -0.00202100 | -1.09713500 |
| C     | 2.64091900  | -0.00114500 | -2.00704900 |
| H     | 2.75951400  | -0.00192000 | -3.07514200 |
| C     | -1.42113600 | -2.45982800 | 0.17275800  |
| H     | -1.59079600 | -2.75265200 | 1.19339100  |
| C     | -1.79108000 | -3.09955700 | -0.99709600 |
| H     | -2.32565100 | -4.02410300 | -1.09713500 |
| C     | -1.32145100 | -2.28653000 | -2.00704900 |
| H     | -1.38142000 | -2.38884900 | -3.07514200 |
| C     | -1.41970600 | 2.46065400  | 0.17275800  |
| H     | -1.58846900 | 2.75399600  | 1.19339100  |
| C     | -1.78875500 | 3.10089900  | -0.99709600 |
| H     | -2.32215000 | 4.02612400  | -1.09713500 |
| C     | -1.31946800 | 2.28767500  | -2.00704900 |
| H     | -1.37809400 | 2.39076900  | -3.07514200 |
| Kr    | 0.00000000  | 0.00000000  | 2.90274600  |
| ***** |             |             |             |

TpBeXe<sup>+</sup>

|     |             |             |             |
|-----|-------------|-------------|-------------|
| l 1 |             |             |             |
| B   | 0.02145500  | -2.42599300 | 0.00000000  |
| H   | 0.03316600  | -3.61293200 | 0.00000000  |
| Be  | -0.00417000 | 0.15332800  | 0.00000000  |
| N   | 1.54301900  | -0.47034500 | 0.00000000  |
| N   | 1.44201400  | -1.81445800 | 0.00000000  |
| N   | -0.77292900 | -0.49352300 | 1.33635400  |
| N   | -0.69944600 | -1.83594100 | 1.23533300  |
| N   | -0.77292900 | -0.49352300 | -1.33635400 |
| N   | -0.69944600 | -1.83594100 | -1.23533300 |
| C   | 2.83542800  | -0.16560800 | 0.00000000  |
| H   | 3.15912600  | 0.85983000  | 0.00000000  |



|    |             |             |             |
|----|-------------|-------------|-------------|
| C  | 3.58845000  | -1.32627500 | 0.00000000  |
| H  | 4.65751700  | -1.41368700 | 0.00000000  |
| C  | 2.66178300  | -2.34736800 | 0.00000000  |
| H  | 2.79319400  | -3.41394500 | 0.00000000  |
| C  | -1.42934900 | -0.21212700 | 2.45578300  |
| H  | -1.61039800 | 0.80673900  | 2.74782100  |
| C  | -1.78930100 | -1.38601300 | 3.09422200  |
| H  | -2.32638400 | -1.49215100 | 4.01662500  |
| C  | -1.30504300 | -2.39040900 | 2.28295500  |
| H  | -1.35286700 | -3.45913700 | 2.38497400  |
| C  | -1.42934900 | -0.21212700 | -2.45578300 |
| H  | -1.61039800 | 0.80673900  | -2.74782100 |
| C  | -1.78930100 | -1.38601300 | -3.09422200 |
| H  | -2.32638400 | -1.49215100 | -4.01662500 |
| C  | -1.30504300 | -2.39040900 | -2.28295500 |
| H  | -1.35286700 | -3.45913700 | -2.38497400 |
| Xe | -0.01233200 | 2.72019800  | 0.00000000  |

\*\*\*\*\*

TPBeRn<sup>+</sup>

|     |             |             |             |
|-----|-------------|-------------|-------------|
| l 1 |             |             |             |
| B   | 0.00000000  | 0.00000000  | -2.89578900 |
| H   | 0.00000000  | 0.00000000  | -4.08296800 |
| Be  | 0.00000000  | 0.00000000  | -0.31139400 |
| N   | -1.54281800 | -0.00026300 | -0.95612200 |
| N   | -1.42672900 | -0.00051700 | -2.29888200 |
| N   | 0.77118100  | 1.33625100  | -0.95612200 |
| N   | 0.71291700  | 1.23584200  | -2.29888200 |
| N   | 0.77163700  | -1.33598800 | -0.95612200 |
| N   | 0.71381200  | -1.23532500 | -2.29888200 |
| C   | -2.83864700 | 0.00000000  | -0.66674500 |
| H   | -3.17484700 | 0.00071300  | 0.35456600  |
| C   | -3.57880800 | -0.00008800 | -1.83614600 |
| H   | -4.64681000 | 0.00011200  | -1.93582900 |
| C   | -2.64012600 | -0.00019900 | -2.84630700 |
| H   | -2.75870800 | 0.00022600  | -3.91439400 |
| C   | 1.41932300  | 2.45834000  | -0.66674500 |
| H   | 1.58804100  | 2.74914200  | 0.35456600  |
| C   | 1.78932800  | 3.09938300  | -1.83614600 |
| H   | 2.32350200  | 4.02419900  | -1.93582900 |
| C   | 1.31989100  | 2.28651600  | -2.84630700 |
| H   | 1.37955000  | 2.38899800  | -3.91439400 |
| C   | 1.41932400  | -2.45834000 | -0.66674500 |
| H   | 1.58680600  | -2.74985500 | 0.35456600  |
| C   | 1.78948000  | -3.09929500 | -1.83614600 |
| H   | 2.32330800  | -4.02431100 | -1.93582900 |

|    |            |             |             |
|----|------------|-------------|-------------|
| C  | 1.32023500 | -2.28631700 | -2.84630700 |
| H  | 1.37915800 | -2.38922400 | -3.91439400 |
| Rn | 0.00000000 | 0.00000000  | 2.33645500  |

\*\*\*\*\*

\*\*\*\*\*

\*\*\*\*\*

TPMgF

|     |             |             |             |
|-----|-------------|-------------|-------------|
| 0 1 |             |             |             |
| B   | 0.00000000  | 0.00000000  | -1.36930100 |
| H   | 0.00000000  | 0.00000000  | -2.56502800 |
| Mg  | 0.00000000  | 0.00000000  | 1.69390200  |
| N   | 0.00000000  | 1.71326700  | 0.47064600  |
| N   | 0.00000000  | 1.44940300  | -0.84541100 |
| N   | 1.48373300  | -0.85663300 | 0.47064600  |
| N   | 1.25522000  | -0.72470200 | -0.84541100 |
| N   | -1.48373300 | -0.85663300 | 0.47064600  |
| N   | -1.25522000 | -0.72470200 | -0.84541100 |
| C   | 0.00000000  | 3.03122400  | 0.60017000  |
| H   | 0.00000000  | 3.47663200  | 1.57928100  |
| C   | 0.00000000  | 3.64107400  | -0.64812200 |
| H   | 0.00000000  | 4.69041400  | -0.87143000 |
| C   | 0.00000000  | 2.59130200  | -1.53741500 |
| H   | 0.00000000  | 2.57735700  | -2.61171100 |
| C   | 2.62511700  | -1.51561200 | 0.60017000  |
| H   | 3.01085200  | -1.73831600 | 1.57928100  |
| C   | 3.15326300  | -1.82053700 | -0.64812200 |
| H   | 4.06201800  | -2.34520700 | -0.87143000 |
| C   | 2.24413300  | -1.29565100 | -1.53741500 |
| H   | 2.23205600  | -1.28867800 | -2.61171100 |
| C   | -2.62511700 | -1.51561200 | 0.60017000  |
| H   | -3.01085200 | -1.73831600 | 1.57928100  |
| C   | -3.15326300 | -1.82053700 | -0.64812200 |
| H   | -4.06201800 | -2.34520700 | -0.87143000 |
| C   | -2.24413300 | -1.29565100 | -1.53741500 |
| H   | -2.23205600 | -1.28867800 | -2.61171100 |
| F   | 0.00000000  | 0.00000000  | 3.46699700  |

\*\*\*\*\*

TPMg+

|     |            |            |             |
|-----|------------|------------|-------------|
| 1 1 |            |            |             |
| B   | 0.00000000 | 0.00000000 | -1.07338000 |
| H   | 0.00000000 | 0.00000000 | -2.26331000 |

|    |             |             |             |
|----|-------------|-------------|-------------|
| N  | 0.00000000  | 1.77168700  | 0.77318900  |
| N  | 0.00000000  | 1.46470400  | -0.54693400 |
| N  | 1.53432600  | -0.88584300 | 0.77318900  |
| N  | 1.26847100  | -0.73235200 | -0.54693400 |
| N  | -1.53432600 | -0.88584300 | 0.77318900  |
| N  | -1.26847100 | -0.73235200 | -0.54693400 |
| C  | 0.00000000  | 3.10163300  | 0.86580700  |
| H  | 0.00000000  | 3.58504500  | 1.82612700  |
| C  | 0.00000000  | 3.67026200  | -0.40024800 |
| H  | 0.00000000  | 4.71229700  | -0.65309700 |
| C  | 0.00000000  | 2.59095800  | -1.26440300 |
| H  | 0.00000000  | 2.55287000  | -2.33822400 |
| C  | 2.68609300  | -1.55081600 | 0.86580700  |
| H  | 3.10474000  | -1.79252200 | 1.82612700  |
| C  | 3.17854000  | -1.83513100 | -0.40024800 |
| H  | 4.08096900  | -2.35614800 | -0.65309700 |
| C  | 2.24383500  | -1.29547900 | -1.26440300 |
| H  | 2.21085000  | -1.27643500 | -2.33822400 |
| C  | -2.68609300 | -1.55081600 | 0.86580700  |
| H  | -3.10474000 | -1.79252200 | 1.82612700  |
| C  | -3.17854000 | -1.83513100 | -0.40024800 |
| H  | -4.08096900 | -2.35614800 | -0.65309700 |
| C  | -2.24383500 | -1.29547900 | -1.26440300 |
| H  | -2.21085000 | -1.27643500 | -2.33822400 |
| Mg | 0.00000000  | 0.00000000  | 1.72946900  |

\*\*\*\*\*

TpMgHe<sup>+</sup>

|     |             |             |             |
|-----|-------------|-------------|-------------|
| 1 1 |             |             |             |
| B   | 0.00000000  | 0.00000000  | -1.13052100 |
| H   | 0.00000000  | 0.00000000  | -2.32021700 |
| N   | -0.00085900 | 1.76406400  | 0.70703800  |
| N   | 0.00048200  | 1.46011500  | -0.61232000 |
| N   | 1.52815400  | -0.88128800 | 0.70703800  |
| N   | 1.26425600  | -0.73047500 | -0.61232000 |
| N   | -1.52729500 | -0.88277600 | 0.70703800  |
| N   | -1.26473800 | -0.72964000 | -0.61232000 |
| C   | -0.00137100 | 3.09028600  | 0.79989600  |
| H   | -0.00239600 | 3.57260600  | 1.76148800  |
| C   | 0.00000000  | 3.65993900  | -0.46028900 |
| H   | 0.00008700  | 4.70287700  | -0.71109400 |
| C   | 0.00039700  | 2.58733000  | -1.32396200 |
| H   | 0.00098000  | 2.55290200  | -2.39801500 |
| C   | 2.67695200  | -1.54395600 | 0.79989600  |
| H   | 3.09516500  | -1.78422800 | 1.76148800  |
| C   | 3.16960000  | -1.82997000 | -0.46028900 |

|    |             |             |             |
|----|-------------|-------------|-------------|
| H  | 4.07276700  | -2.35151400 | -0.71109400 |
| C  | 2.24049500  | -1.29400900 | -1.32396200 |
| H  | 2.21038800  | -1.27730000 | -2.39801500 |
| C  | -2.67558100 | -1.54633000 | 0.79989600  |
| H  | -3.09277000 | -1.78837800 | 1.76148800  |
| C  | -3.16960000 | -1.82996900 | -0.46028900 |
| H  | -4.07285400 | -2.35136300 | -0.71109400 |
| C  | -2.24089200 | -1.29332100 | -1.32396200 |
| H  | -2.21136800 | -1.27560200 | -2.39801500 |
| Mg | 0.00000000  | 0.00000000  | 1.66876600  |
| He | 0.00000000  | 0.00000000  | 3.85990000  |

\*\*\*\*\*

TpMgNe<sup>+</sup>

|     |             |             |             |
|-----|-------------|-------------|-------------|
| 1 1 |             |             |             |
| B   | 0.00000000  | 0.00000000  | -1.37618900 |
| H   | 0.00000000  | 0.00000000  | -2.56589700 |
| N   | 0.00000000  | 1.76362700  | 0.46105000  |
| N   | 0.00000000  | 1.45994400  | -0.85806400 |
| N   | 1.52734600  | -0.88181300 | 0.46105000  |
| N   | 1.26434900  | -0.72997200 | -0.85806400 |
| N   | -1.52734600 | -0.88181300 | 0.46105000  |
| N   | -1.26434900 | -0.72997200 | -0.85806400 |
| C   | 0.00000000  | 3.08985600  | 0.55392300  |
| H   | 0.00000000  | 3.57197600  | 1.51559900  |
| C   | 0.00000000  | 3.65966700  | -0.70621300 |
| H   | 0.00000000  | 4.70263800  | -0.95694500 |
| C   | 0.00000000  | 2.58711900  | -1.56991200 |
| H   | 0.00000000  | 2.55268400  | -2.64395900 |
| C   | 2.67589400  | -1.54492800 | 0.55392300  |
| H   | 3.09342200  | -1.78598800 | 1.51559900  |
| C   | 3.16936500  | -1.82983300 | -0.70621300 |
| H   | 4.07260400  | -2.35131900 | -0.95694500 |
| C   | 2.24051100  | -1.29355900 | -1.56991200 |
| H   | 2.21068900  | -1.27634200 | -2.64395900 |
| C   | -2.67589400 | -1.54492800 | 0.55392300  |
| H   | -3.09342200 | -1.78598800 | 1.51559900  |
| C   | -3.16936500 | -1.82983300 | -0.70621300 |
| H   | -4.07260400 | -2.35131900 | -0.95694500 |
| C   | -2.24051100 | -1.29355900 | -1.56991200 |
| H   | -2.21068900 | -1.27634200 | -2.64395900 |
| Mg  | 0.00000000  | 0.00000000  | 1.42547400  |
| Ne  | 0.00000000  | 0.00000000  | 3.79340100  |

\*\*\*\*\*

TpMgAr<sup>+</sup>

```

1 1
B      0.01147800 -1.62613400  0.00000000
H      0.02120400 -2.81607300  0.00000000
N      1.75785200  0.22321100  0.00000000
N      1.46650100 -1.09733900  0.00000000
N     -0.88504200  0.20534100  1.52106300
N     -0.72158300 -1.11244700  1.26329000
N     -0.88504200  0.20534100 -1.52106300
N     -0.72158300 -1.11244700 -1.26329000
C      3.08334200  0.32785300  0.00000000
H      3.55647000  1.29398500  0.00000000
C      3.66469900 -0.92713500  0.00000000
H      4.70981200 -1.16875600  0.00000000
C      2.59927400 -1.79981300  0.00000000
H      2.57377800 -2.87407100  0.00000000
C     -1.55012700  0.29558400  2.66842200
H     -1.80015200  1.25631100  3.08285900
C     -1.82487300 -0.96551400  3.16623400
H     -2.34527000 -1.21808900  4.06957900
C     -1.28008300 -1.82702000  2.24051600
H     -1.25346700 -2.90093000  2.21335500
C     -1.55012700  0.29558400 -2.66842200
H     -1.80015200  1.25631100 -3.08285900
C     -1.82487300 -0.96551400 -3.16623400
H     -2.34527000 -1.21808900 -4.06957900
C     -1.28008300 -1.82702000 -2.24051600
H     -1.25346700 -2.90093000 -2.21335500
Mg     -0.00294800  1.19896100  0.00000000
Ar     -0.02145000  3.78943300  0.00000000
*****

```

TpMgKr<sup>+</sup>

```

1 1
B     -2.08867500  0.00000000  0.00000000
H     -3.27888000  0.00000000  0.00000000
N     -0.25118700  1.75772100  0.00000000
N     -1.56989600  1.45846300  0.00000000
N     -0.25118700 -0.87886000 -1.52223100
N     -1.56989600 -0.72923100 -1.26306600
N     -0.25118700 -0.87886000  1.52223100
N     -1.56989600 -0.72923100  1.26306600
C     -0.15529600  3.08346300  0.00000000
H      0.80760300  3.56313300  0.00000000
C     -1.41403300  3.65739900  0.00000000
H     -1.66221700  4.70096800  0.00000000
C     -2.27999800  2.58682900  0.00000000

```

|    |             |             |             |
|----|-------------|-------------|-------------|
| H  | -3.35407000 | 2.55425400  | 0.00000000  |
| C  | -0.15529600 | -1.54173100 | -2.67035700 |
| H  | 0.80760300  | -1.78156600 | -3.08576300 |
| C  | -1.41403300 | -1.82870000 | -3.16740000 |
| H  | -1.66221700 | -2.35048400 | -4.07115800 |
| C  | -2.27999800 | -1.29341500 | -2.24026000 |
| H  | -3.35407000 | -1.27712700 | -2.21204800 |
| C  | -0.15529600 | -1.54173100 | 2.67035700  |
| H  | 0.80760300  | -1.78156600 | 3.08576300  |
| C  | -1.41403300 | -1.82870000 | 3.16740000  |
| H  | -1.66221700 | -2.35048400 | 4.07115800  |
| C  | -2.27999800 | -1.29341500 | 2.24026000  |
| H  | -3.35407000 | -1.27712700 | 2.21204800  |
| Mg | 0.74598800  | 0.00000000  | 0.00000000  |
| Kr | 3.47019700  | 0.00000000  | 0.00000000  |

\*\*\*\*\*

TpMgXe<sup>+</sup>

|     |             |             |             |
|-----|-------------|-------------|-------------|
| 1 1 |             |             |             |
| B   | 0.00000000  | 0.00000000  | -2.50457800 |
| H   | 0.00000000  | 0.00000000  | -3.69502200 |
| N   | 1.75538900  | 0.00000000  | -0.66688700 |
| N   | 1.45787400  | -0.00175600 | -1.98548500 |
| N   | -0.87769500 | -1.52021100 | -0.66688700 |
| N   | -0.73045800 | -1.26167800 | -1.98548500 |
| N   | -0.87769400 | 1.52021200  | -0.66688700 |
| N   | -0.72741600 | 1.26343400  | -1.98548500 |
| C   | 3.08087800  | -0.00082500 | -0.56947500 |
| H   | 3.55926800  | 0.00012800  | 0.39404200  |
| C   | 3.65653500  | -0.00322800 | -1.82762400 |
| H   | 4.70036600  | -0.00434300 | -2.07466400 |
| C   | 2.58686900  | -0.00340900 | -2.69465900 |
| H   | 2.55518100  | -0.00466200 | -3.76873900 |
| C   | -1.54115400 | -2.66770600 | -0.56947500 |
| H   | -1.77952300 | -3.08248100 | 0.39404200  |
| C   | -1.83106300 | -3.16503800 | -1.82762400 |
| H   | -2.35394400 | -4.06846500 | -2.07466400 |
| C   | -1.29638700 | -2.23859000 | -2.69465900 |
| H   | -1.28162800 | -2.21052100 | -3.76873900 |
| C   | -1.53972400 | 2.66853100  | -0.56947500 |
| H   | -1.77974500 | 3.08235300  | 0.39404200  |
| C   | -1.82547200 | 3.16826600  | -1.82762400 |
| H   | -2.34642200 | 4.07280800  | -2.07466400 |
| C   | -1.29048200 | 2.24199900  | -2.69465900 |
| H   | -1.27355300 | 2.21518300  | -3.76873900 |
| Mg  | 0.00000000  | 0.00000000  | 0.34291800  |

Xe            0.00000000   0.00000000   3.25560100  
 \*\*\*\*\*

TpMgRn<sup>+</sup>

1 1  
 B            0.00000000   0.00000000   -3.03794200  
 H            0.00000000   0.00000000   -4.22847600  
 N            1.75416700   0.00000000   -1.20014900  
 N            1.45757600   -0.00179100   -2.51863300  
 N            -0.87708300   -1.51915300   -1.20014900  
 N            -0.73033900   -1.26140200   -2.51863300  
 N            -0.87708300   1.51915300   -1.20014900  
 N            -0.72723700   1.26319300   -2.51863300  
 C            3.07953000   -0.00093000   -1.10194500  
 H            3.55720600   -0.00001300   -0.13808300  
 C            3.65608600   -0.00350200   -2.35980500  
 H            4.70005600   -0.00477300   -2.60625100  
 C            2.58687800   -0.00351100   -3.22739600  
 H            2.55563200   -0.00477200   -4.30148300  
 C            -1.54057000   -2.66648600   -1.10194500  
 H            -1.77861400   -3.08062400   -0.13808300  
 C            -1.83107600   -3.16451200   -2.35980500  
 H            -2.35416200   -4.06798100   -2.60625100  
 C            -1.29648000   -2.23854700   -3.22739600  
 H            -1.28194900   -2.21085600   -4.30148300  
 C            -1.53896000   2.66741600   -1.10194500  
 H            -1.77859200   3.08063700   -0.13808300  
 C            -1.82501000   3.16801400   -2.35980500  
 H            -2.34589400   4.07275400   -2.60625100  
 C            -1.29039800   2.24205800   -3.22739600  
 H            -1.27368300   2.21562800   -4.30148300  
 Mg            0.00000000   0.00000000   -0.18352900  
 Rn            0.00000000   0.00000000   2.80531400

\*\*\*\*\*
